# Supplementary material for: Experimental and molecular predictions of the adjuvanticity of snail mucin on hepatitis B vaccine in albino mice
Source: PLOS journal article supplement (doi:10.1371/journal.pone.0246915), 2021-07-23
Supplement: S2 (10.1371/journal.pone.0246915.s002) [file journal.pone.0246915.s002]

**S2 Table: Effect of snail mucin-adjuvanted rHBsAg vaccine on monocyte count of experimental mice**

|                | <b>Monocyte count (%) (Comparison within and across groups)</b> |                                          |                                        |                                        |
|----------------|-----------------------------------------------------------------|------------------------------------------|----------------------------------------|----------------------------------------|
|                | <b>Day 0</b>                                                    | <b>Day 14</b>                            | <b>Day 21</b>                          | <b>Day 28</b>                          |
| <b>Group 1</b> | <b><math>0.67 \pm 0.17^{aA}</math></b>                          | <b><math>0.00 \pm 0.00^{aA}</math></b>   | <b><math>0.67 \pm 0.17^{aA}</math></b> | <b><math>0.33 \pm 0.03^{aA}</math></b> |
| <b>Group 2</b> | <b><math>0.33 \pm 0.03^{aA}</math></b>                          | <b><math>1.00 \pm 0.00^{abAB}</math></b> | <b><math>0.33 \pm 0.03^{aA}</math></b> | <b><math>1.67 \pm 0.38^{bA}</math></b> |
| <b>Group 3</b> | <b><math>0.33 \pm 0.03^{aA}</math></b>                          | <b><math>1.67 \pm 0.38^{aB}</math></b>   | <b><math>0.33 \pm 0.03^{aA}</math></b> | <b><math>0.67 \pm 0.17^{aA}</math></b> |
| <b>Group 4</b> | <b><math>0.00 \pm 0.00^{aA}</math></b>                          | <b><math>0.00 \pm 0.00^{aA}</math></b>   | <b><math>0.33 \pm 0.03^{aA}</math></b> | <b><math>0.67 \pm 0.17^{aA}</math></b> |
| <b>Group 5</b> | <b><math>1.00 \pm 0.48^{aA}</math></b>                          | <b><math>0.67 \pm 0.17^{aAB}</math></b>  | <b><math>1.00 \pm 0.48^{aA}</math></b> | <b><math>0.33 \pm 0.03^{aA}</math></b> |

Results are expressed as mean  $\pm$  SD (n=3). Mean values with different small letters as superscripts within the groups were considered significant at  $p < 0.05$  and mean values with different capital letters as superscripts across the groups were considered significant at  $p < 0.05$

Group 1: rHBsAg vaccine alone: 3 doses

Group 2: rHBsAg vaccine alone: 2 doses

Group 3: rHBsAg vaccine + Snail mucin: 2 doses

Group 4: Snail mucin alone: 2 doses

Group 5: Normal saline: 3 doses
